# Supplementary material
Source: HighWire-hosted journal article supplement (https://bmjopen.bmj.com/content/12/7/e058523)
Supplement: inline-supplementary-material-2 [file inline-supplementary-material-2.pdf]

Table 2: Critical appraisal of studies using The Joanna Briggs Institute Critical appraisal tool for Qualitative Research:

| Study<br>(location,<br>number and<br>category of<br>Participants)              | JBI<br>Check<br>list | Q1:Congruity<br>b/w<br>philosophy<br>and research | Q2: Congruity<br>b/w research<br>method and<br>question | Q3:congruity<br>b/w<br>Research<br>method<br>&Data collection | Q4:congruity<br>b/w<br>Research<br>method &<br>analysis | Q5: congruity<br>b/w<br>Research<br>method &<br>Results | Q6:<br>Statement<br>Locating<br>the<br>researcher | Q7:<br>Influence<br>Of<br>Researcher<br>addressed | Q8:<br>Adequate<br>Representa-<br>tion of<br>Participants | Q9:ethical<br>approval | Q10:<br>Conclusion<br>Flows from<br>analysis | Appraisal | R for<br>exclusion |
|--------------------------------------------------------------------------------|----------------------|---------------------------------------------------|---------------------------------------------------------|---------------------------------------------------------------|---------------------------------------------------------|---------------------------------------------------------|---------------------------------------------------|---------------------------------------------------|-----------------------------------------------------------|------------------------|----------------------------------------------|-----------|--------------------|
| 1.Voorhees et al., US<br>and Netherlands,<br>physicians 23                     |                      | Y                                                 | Y                                                       | Y                                                             | Y                                                       | Y                                                       | Y                                                 | N                                                 | Y                                                         | Y                      | Y                                            | Include   |                    |
| 2.Van Marwijk et al.<br>Netherlands 22<br>Primary care ph                      |                      | Y                                                 | Y                                                       | Y                                                             | Y                                                       | Y                                                       | N                                                 | N                                                 | Y                                                         | Unc                    | Y                                            | Include   |                    |
| 3. Denier Yvonne et al.<br>2010. Belgium Nurses-<br>n=18                       |                      | Y                                                 | Y                                                       | Y                                                             | Y                                                       | Y                                                       | N                                                 | N                                                 | Y                                                         | Y                      | Y                                            | include   |                    |
| 4. Elizabeth Norton et<br>al. 2012<br>USA-social worker-9                      |                      | Y                                                 | Y                                                       | Y                                                             | Y                                                       | Y                                                       | N                                                 | N                                                 | Y                                                         | Unc                    | Y                                            | include   |                    |
| 5. JJ Georges et al.<br>2008. Netherlands 30<br>GPs                            |                      | Y                                                 | Y                                                       | Y                                                             | Y                                                       | Y                                                       | N                                                 | N                                                 | Y                                                         | Unc                    | Y                                            | Include   |                    |
| 6. Snijdewind et al.,<br>2014<br>(Netherlands, 28<br>physicians)               |                      | Y                                                 | Y                                                       | Y                                                             | Y                                                       | Y                                                       | N                                                 | N                                                 | Y                                                         | N                      | Y                                            | include   |                    |
| 7. Katja ten Cate et al.,<br>2017-33 physicians<br>netherlands                 |                      | Y                                                 | Y                                                       | Y                                                             | Y                                                       | Y                                                       | N                                                 | N                                                 | Y                                                         | Y                      | Y                                            | include   |                    |
| 8. Donald G Van tol et<br>al., 2012. Netherlands<br>15 physicians              |                      | Y                                                 | Y                                                       | Y                                                             | Y                                                       | Y                                                       | N                                                 | N                                                 | Y                                                         | N                      | Y                                            | include   |                    |
| 9.Veronica Lorraine<br>Fausto Melchor, 2018.<br>USA Hospice social<br>worker 8 |                      | Y                                                 | Y                                                       | Y                                                             | Y                                                       | Y                                                       | Y                                                 | Y                                                 | Y                                                         | Y                      | Y                                            | include   |                    |
| 10. Pamela Miller et<br>al., 2008 Oregon SW-8                                  |                      | Y                                                 | Y                                                       | Y                                                             | Y                                                       | Y                                                       | N                                                 | N                                                 | Y                                                         | Unc                    | Y                                            | Include   |                    |
| 11. Deborah Volker et<br>al., 2001. USA Onco<br>Nurse-40                       |                      | Y                                                 | Y                                                       | Y                                                             | Y                                                       | Y                                                       | N                                                 | N                                                 | Y                                                         | Unc                    | Y                                            | Include   |                    |

|                                                                                                                               |   |   |   |   |   |   |   |   |     |   |         |                                                                                     |
|-------------------------------------------------------------------------------------------------------------------------------|---|---|---|---|---|---|---|---|-----|---|---------|-------------------------------------------------------------------------------------|
| 12. michael Young et al., 2008 Canada nurses-22                                                                               | Y | N | Y | Y | Y | N | N | Y | Y   | Y | exclude | Study done at a time assisted death not legal, so does not meet inclusion criteria. |
| 13. Rosanne Beuthin et al., 2018 Canada nurses-17                                                                             | Y | Y | Y | Y | Y | N | N | Y | Y   | Y | include |                                                                                     |
| 14. eva Bolt et al., 2017 Netherlands paediatrician-8                                                                         | Y | Y | Y | Y | Y | N | N | Y | NR  | Y | include |                                                                                     |
| 15. Dolores Angela Castelli Dransart et al., 2017 Switzerland-20 nurse, 1 physician, 8 directors, 3 socio-cultural animators. | Y | Y | Y | Y | Y | N | N | Y | Y   | Y | include |                                                                                     |
| 16. Marianne Dees et al., 2012 Netherlands-phy-28                                                                             | Y | Y | Y | Y | Y | N | N | Y | Y   | Y | include |                                                                                     |
| 17. Theresa Harvath et al., 2006. USA hospice social workers-20                                                               | Y | Y | Y | Y | Y | N | N | Y | Y   | Y | include |                                                                                     |
| 18. Ina Otte et al., 2017. Switzerland GP's-20                                                                                | Y | Y | Y | Y | Y | N | N | Y | Y   | Y | include |                                                                                     |
| 19. Ada van de Scheur, Arie van der Arend, 1998 Netherlands Nurse-20                                                          | Y | Y | Y | Y | Y | N | N | Y | Unc | Y | include |                                                                                     |
| 20. Belanger E. et al., 2019 Canada-palliative care physicians-18                                                             | Y | Y | Y | Y | Y | N | N | Y | Y   | Y | include |                                                                                     |
| 21. Jessica Shaw et al., 2018. canada phy-8                                                                                   | Y | Y | N | Y | Y | N | N | Y | Unc | Y | include |                                                                                     |
| 22. Judith Schwartz 2004. USA nurses-10                                                                                       | Y | Y | Y | Y | Y | N | N | Y | Y   | Y | include |                                                                                     |

|                                                                              |   |   |   |   |   |   |   |   |     |         |                |                                                                              |
|------------------------------------------------------------------------------|---|---|---|---|---|---|---|---|-----|---------|----------------|------------------------------------------------------------------------------|
| 23. Dobscha SJ et al., 2004. USA phy-35                                      | Y | N | Y | Y | Y | N | N | Y | Y   | Y       | <b>Exclude</b> | No theme of emotional impact.                                                |
| 24. Galusko et al., 2015, Germany 19 specialized palliative care physicians. | Y | Y | Y | Y | Y | N | N | Y | Y   | Y       | <b>Exclude</b> | Desire to hasten death-definition ambiguous                                  |
| 25. Susanne Brauer et al., 2015. Switzerland, 12 physicians                  | Y | Y | Y | Y | Y | N | N | N | N   | Unclear | <b>Exclude</b> | Opinions known, but no emotional impact theme                                |
| 26. Linda (b) Oregon phy-35                                                  | N | Y | Y | Y | Y | N | N | Y | Y   | Y       | <b>Exclude</b> | Physician opinion of patients req                                            |
| 27. Deborah-texas nurses-36                                                  | N | Y | N | Y | Y | N | N | Y | Unc | Y       | <b>Exclude</b> | No of the nurses participated in assisted suicide in any way                 |
| 28. D Van Rooyan, Dutch nurses-7                                             | N | N | Y | Y | Y | N | N | Y | N   | Y       | <b>Exclude</b> | More with withdrawal of treatment does not meet criteria                     |
| 29. vanderspank canada Nurses                                                | N | N | Y | Y | Y | N | N | Y | Y   | Y       | <b>Exclude</b> | SR on nurses experience with withdrawal of treatment- does not meet criteria |
| 30. Joanne Wolfe USA 324 Oncologists                                         | Y | N | N | Y | Y | N | N | N | Y   | Y       | <b>Exclude</b> | Telephone based survey interviews.                                           |
| 31. Booij et al., 2012 Netherlands 15 physicians                             | Y | N | Y | Y | Y | N | N | N | Y   | Y       | <b>Exclude</b> | No particular description of emotional impact                                |
| 32. Denier et al., 2010 Belgium 18 Nurses                                    | Y | N | Y | Y | Y | N | N | Y | Y   | Y       | <b>Exclude</b> | More about communicati                                                       |

|                                                                 |   |   |   |   |   |   |   |   |   |   |  |                |                                                                                                                |
|-----------------------------------------------------------------|---|---|---|---|---|---|---|---|---|---|--|----------------|----------------------------------------------------------------------------------------------------------------|
|                                                                 |   |   |   |   |   |   |   |   |   |   |  |                | on and communicati<br>on attitudes<br>and not<br>about<br>emotional<br>impact                                  |
| 33. Bernadette Dierckx<br>2010 Belgium 18<br>nurses             | Y | N | Y | Y | Y | N | N | Y | Y | Y |  | <b>Exclude</b> | Stage of<br>carrying out a<br>request, no<br>emotional<br>impact<br>described.                                 |
| 34. sercu et al. 2012                                           | Y | N | Y | Y | Y | N | N | Y | Y | Y |  | <b>Exclude</b> | Palliative<br>sedation and<br>euthanasia-<br>boundary lines<br>unclear in the<br>paper.                        |
| 35. Volker 2007 USA.<br>19 oncology advanced<br>practice nurses | Y | N | Y | Y | N | N | N | Y | Y | Y |  | <b>Exclude</b> | No<br>engagement<br>in assisted<br>death as<br>illegal in the<br>place of<br>practice.                         |
| 36. Thulesius et al.<br>2013 Sweden                             | Y | N | Y | Y | N | N | Y | N | Y | Y |  | <b>Exclude</b> | No<br>engagement,<br>assisted<br>death is<br>illegal in<br>Sweden.<br>Majority data<br>from HCPs in<br>Sweden. |
| 37. Marike E. de Boer<br>2011 Netherlands.                      | Y | N | Y | Y | N | N | Y | Y | Y | Y |  | <b>Exclude</b> | Experiences,<br>but no<br>emotional<br>impact                                                                  |
| 38. Neel De Bal 2006<br>Belgium                                 | Y | N | Y | Y | N | N | Y | Y | Y | Y |  | <b>Exclude</b> | Conducted at<br>a time when<br>Euthanasia<br>was still<br>illegal, hence<br>does not<br>meet                   |

|                                                                       |   |   |   |   |   |   |   |   |   |   |         |                                                                                    |
|-----------------------------------------------------------------------|---|---|---|---|---|---|---|---|---|---|---------|------------------------------------------------------------------------------------|
|                                                                       |   |   |   |   |   |   |   |   |   |   |         | inclusion criteria.                                                                |
| 39. Bernadette 2006 Belgium                                           | Y | N | Y | Y | N | N | Y | Y | Y | Y | Exclude | As above.                                                                          |
| 40. Veerport et al 2006 USA                                           | Y | N | Y | Y | N | N | Y | Y | Y | Y | Exclude | As above                                                                           |
| 41. Wright et al., 2017 Canada                                        | Y | N | Y | Y | N | N | Y | Y | Y | Y | Exclude | Data collected in 2012-2013 when MAiD illegal.                                     |
| 42. Curry et al., 2000 USA, Connecticut 909 physicians.               | Y | N | Y | Y | N | N | N | N | Y | Y | Exclude | Assisted suicide illegal, Plus experiences and no emotional impact                 |
| 43. Susan Price 2001 USA, 11 nurses and 10 physicians. North Carolina | Y | N | Y | Y | N | N | Y | Y | Y | Y | Exclude | Assisted suicide illegal in North Carolina, hence does not meet inclusion criteria |
| 44. France Norwood 2009 Netherlands                                   | Y | N | Y | Y | N | N | Y | Y | Y | Y | Exclude | No emotional impact. Evaluates absence of abuse                                    |
| 45. Smith et al., 2013 USA, South Mississippi                         | Y | N | Y | Y | N | N | Y | Y | Y | Y | Exclude | Assisted death illegal in mississippi and hence does not meet inclusion criteria   |
| 46. Beuthin et al., 2020 Canada 8 physicians.                         | Y | Y | Y | Y | N | N | Y | Y | Y | Y | include |                                                                                    |
| 47. Khosnood et al., 2018 19 physicians, Canada                       | Y | Y | Y | Y | N | N | Y | Y | Y | Y | Include |                                                                                    |

|                                                                                                      |   |   |   |   |   |   |   |   |   |   |         |  |
|------------------------------------------------------------------------------------------------------|---|---|---|---|---|---|---|---|---|---|---------|--|
| 48. Pesut et al., 2020<br>59 RN and NPs,<br>Canada                                                   | Y | Y | Y | Y | N | Y | Y | Y | Y | Y | include |  |
| 49. Keri-Lyn Durant<br>and Katherine kortes<br>Miller 2020 Canada                                    | Y | Y | Y | Y | N | Y | Y | Y | Y | Y | Include |  |
| 50. Snijdewind et al.,<br>2016 Netherlands 28<br>physicians                                          | Y | Y | Y | Y | N | N | Y | Y | Y | Y | include |  |
| 51. Mathews et al.,<br>2021. Canada<br>23 palliative care<br>providers (13<br>physicians, 10 nurses) | Y | Y | Y | Y | N | N | Y | Y | Y | Y | include |  |

| Grey literature                                                     | JBI Checklist | Q1:Congruity b/w philosophy and research | Q2:congruity b/w research method &question | Q3:congruity b/w Research method &Data collection | Q4:congruity b/w Research method & analysis | Q5: congruity b/w Research method & Results | Q6:Statement Locating the researcher | Q7: Influence Of Researcher addressed | Q8: Adequate Representa-Tion of Participants | Q9:ethical approval | Q10: Conclusion Flows from analysis | Appraisal | Reason for exclusion                                                          |
|---------------------------------------------------------------------|---------------|------------------------------------------|--------------------------------------------|---------------------------------------------------|---------------------------------------------|---------------------------------------------|--------------------------------------|---------------------------------------|----------------------------------------------|---------------------|-------------------------------------|-----------|-------------------------------------------------------------------------------|
| 1.Rosanne Beuthin, 2018. Canada. Nurse-1                            |               | Y                                        | Y                                          | Y                                                 | Y                                           | Y                                           | N                                    | N                                     | Y                                            | Y                   | Y                                   | include   |                                                                               |
| 2. Evenblij et al., 2019. Netherlands, 1374 phys                    |               | Y                                        | Y                                          | Y                                                 | Y                                           | Y                                           | N                                    | N                                     | N                                            | Y                   | Y                                   |           | Exclude. 12 page questionnaire survey. Indepth exploration of emotion impact. |
| 3. Alison Townsley 2018, Canada. 7 Nurses, SW and PSWs.             |               | Y                                        | Y                                          | Y                                                 | Y                                           | Y                                           | Y                                    | N                                     | Y                                            | Y                   | Y                                   | include   |                                                                               |
| 4. Gamondi et al., 2017, Switzerland. 23 palliative care physicians |               | Y                                        | Y                                          | Y                                                 | Y                                           | Y                                           | N                                    | N                                     | Y                                            | Y                   | Y                                   | include   |                                                                               |
| 5. Bouthillier M-E, Opatry L 2019                                   |               | Y                                        | Y                                          | Y                                                 | Y                                           | Y                                           | N                                    | N                                     | Y                                            | Y                   | Y                                   | include   |                                                                               |
| 6. Joy Cayetano-Penman et al., July 2021 Australia. 21 Nurses.      |               | Y                                        | Y                                          | Y                                                 | Y                                           | Y                                           | N                                    | N                                     | Y                                            | Y                   | Y                                   |           | Exclude. More a knowledge And attitude Rather than emotion impact.            |

|                                                                                                |   |   |   |   |   |   |   |   |   |   |         |                                                                                                 |
|------------------------------------------------------------------------------------------------|---|---|---|---|---|---|---|---|---|---|---------|-------------------------------------------------------------------------------------------------|
| 7 Bruce A, Beuthin R 2019.                                                                     | Y | Y | Y | Y | Y | N | N | Y | Y | Y | include |                                                                                                 |
| 8. Buchbinder et al, 2019 Vermont, USA. 37 health Care providers                               | Y | Y | Y | Y | Y | N | Y | Y | Y | Y | include |                                                                                                 |
| 9 Allyson Oliphant 2017, Canada                                                                | Y | Y | Y | Y | Y | Y | N | Y | Y | Y | include |                                                                                                 |
| 10 Kopchek, Lauren 2020, Canada. (masters thesis or Nurses)                                    | Y | Y | Y | Y | Y | N | N | N | Y | Y |         | Exclude as study explored the ethical decision making experiences rather than emotional impact. |
| 11 Gagnard, ME., Hurst, S. 2019. Switzerland. 26 Palliative as well as Primary care Providers. | Y | Y | Y | Y | Y | N | N | Y | Y | Y |         | Exclude. Explores Perspective on Existential Suffering and Not on Emotional Impact.             |
| 12 Ellen Wiebe et Al, April 2021. Canada. 14 Physicians and 1 NP                               | Y | Y | Y | Y | Y | N | N | Y | Y | Y |         | Exclude. Themes of Difficulties Providing MAiD during Covid 19 Rather than emotional Impact.    |
| 13. Sheridan, Laura 2017                                                                       | Y | Y | Y | Y | Y | N | N | Y | Y | Y | include |                                                                                                 |

**Total Included studies (N): 27 (Databases: OVID Medline, EMBASE, CINAHL, SCOPUS) + 8 (Grey literature search)=35**

**Critical Appraisal tool: The Joanna Briggs Institute Critical appraisal tools for use in Systematic reviews: checklist for Qualitative research Available from:**

<http://joannabriggs.org/research/critical-appraisal-tools.html>

**Discussion:** Lockwood C, Munn Z, Porritt K. Qualitative research synthesis: methodological guidance for systematic reviewers utilizing meta-aggregation. *Int J Evid Based Healthc.* 2015;13(3):179–187.

Grey Literature databases (December 10th 2018 to March 1st, 2019, updated August 2020 and August 2021)

Total # Records after de-duplication: 13. Records selected after applying critical appraisal tool: 8.

| Database                                        | Search strategy                                                                                                                                                                              | #records screened | # new records selected after applying after de-duplication and applying critical appraisal tool |
|-------------------------------------------------|----------------------------------------------------------------------------------------------------------------------------------------------------------------------------------------------|-------------------|-------------------------------------------------------------------------------------------------|
| Google scholar                                  | With the exact phrase: "Medical assistance in dying" ; "physician assisted suicide"; With all the words: "emotional impact on health care providers involved in medical assistance in dying" | 400               | 5                                                                                               |
| Des Lebris/Canadian Electronic Library          | Medical assistance in dying                                                                                                                                                                  | 5                 | 0                                                                                               |
| Canadian Institute of Health Information (CIHI) | Medical assistance in dying                                                                                                                                                                  | 7                 | 0                                                                                               |
| OAIster database (includes WordCAT)             | Medical Assistance in dying, Physician assisted suicide as key word                                                                                                                          | 206               | 2                                                                                               |
| OpenGrey                                        | Medical assistance in dying, Physician Assisted suicide as key word                                                                                                                          | 4                 | 0                                                                                               |
| BASE ( Bielefeld Academic Search Engine)        | Subject Heading search: "Medical Assistance in dying"                                                                                                                                        | 670               | 1                                                                                               |

Selected records:

Google scholar included Results:

1. Beuthin R. Cultivating Compassion: The Practice Experience of a Medical Assistance in Dying Coordinator in Canada. *Qualitative Health Research*. 2018;28(11):1679-1691. doi:[10.1177/1049732318788850](https://doi.org/10.1177/1049732318788850)
2. Bouthillier M-E, Opatrny L. A qualitative study of physicians' conscientious objections to medical aid in dying. *Palliative Medicine*. 2019;33(9):1212-1220. doi:[10.1177/0269216319861921](https://doi.org/10.1177/0269216319861921)
3. Bruce A, Beuthin R. Medically Assisted Dying in Canada: "Beautiful Death" Is Transforming Nurses' Experiences of Suffering. *Canadian Journal of Nursing Research*. June 2019. doi:[10.1177/0844562119856234](https://doi.org/10.1177/0844562119856234)
4. Alison A. Townsley. Putting a Bow on Death and Dying-Health Care Professionals' Experiences with Medical Assistance in Dying (MAiD): A Foucauldian Discourse Analysis with Agambian Insights. [Practice Based Research Paper on the Internet]. York University School of Social Work; 2018. [Cited February 28,2019] Available from: [https://yorkspace.library.yorku.ca/xmlui/bitstream/handle/10315/35613/Alison\\_Townsley\\_PRP\\_2018.pdf?sequence=1](https://yorkspace.library.yorku.ca/xmlui/bitstream/handle/10315/35613/Alison_Townsley_PRP_2018.pdf?sequence=1)
5. Gamondi C, Borasio GD, Oliver P, Preston N, Payne S. Responses to assisted suicide requests: an interview study with Swiss palliative care physicians. *BMJ Support Palliat Care*. 2019 Mar;9(1):e7. doi: 10.1136/bmjspcare-2016-001291. Epub 2017 Aug 11. Available from <https://pubmed.ncbi.nlm.nih.gov/28801317/>

OAlster included Results:

1. Implementing Medical Aid-in-Dying in Vermont: a Qualitative Study. *J GEN INTERN MED* **34**, 636–641 (2019). <https://doi.org/10.1007/s11606-018-4811-1>
2. Allyson Oliphant. "If Not Me, Then Who?" The Narratives of Medical Aid in Dying (MAiD) Providers and Supporters Around Their Professional Identity and Role in MAiD [Thesis on the Internet]. MacMaster University; 2017. [Cited on February 10, 2019]. Available from <http://hdl.handle.net/11375/22146>

BASE included results:

1. Sheridan, Laura, "When Patients Ask to Die: The Role of Nurses in Medical Assistance in Dying" (2017). Electronic Thesis and Dissertation Repository. 5041. <https://ir.lib.uwo.ca/etd/5041>
